# Supplementary material
Source: PubMed Central journal article supplement (PMC2635042)
Supplement: M804935200_1.pdf [file M804935200_1.pdf]

SUPPLEMENTARY FIGURES

**A**

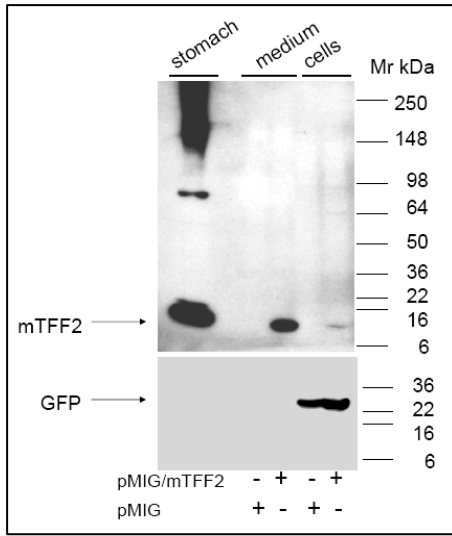

**B**

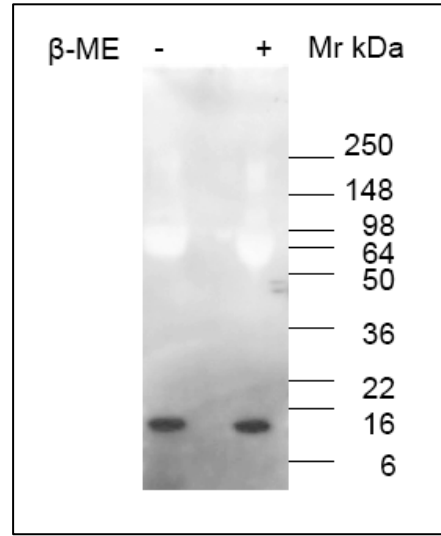

**Supplementary Figure 1. Recombinant Jurkat (pMIG/mTFF2) cells secrete trefoil peptide in culture medium in monomeric form.** (A) Jurkat (pMIG) and Jurkat (pMIG/mTFF2) cells were grown in complete medium for 2 days. Media and cell extracts were successively analyzed for the presence of TFF2 (upper panel) and GFP (bottom panel) in western blot analysis with relevant antibodies. Recombinant TFF2 was detected mainly in culture medium while GFP accumulated into cells. (B) Western blot analysis of medium with the secreted mouse TFF2 under reducing (+) and nonreducing (-) conditions. Both reduced and unreduced TFF2 peptides migrate as a single monomeric form.

**A**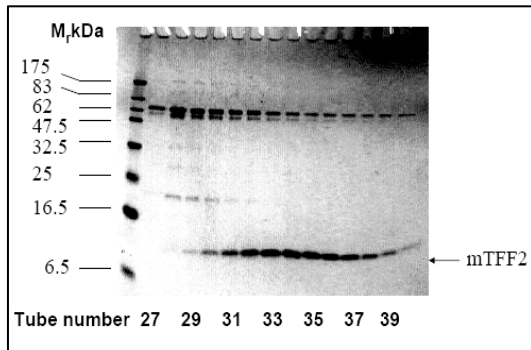**B**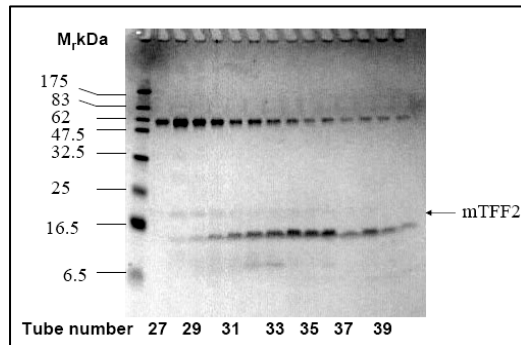**C**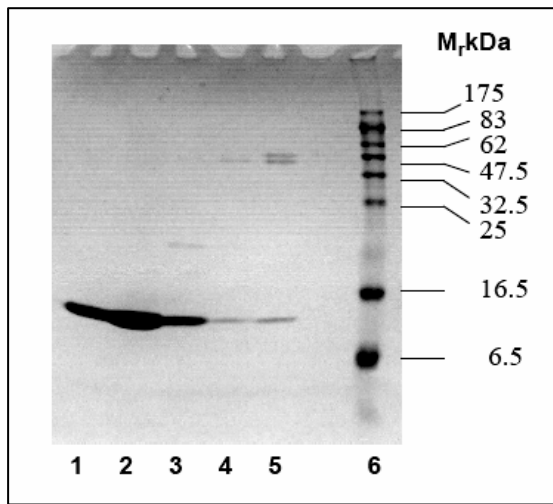**D**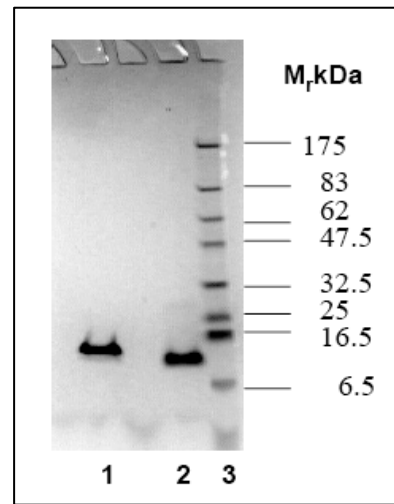

**Supplementary Fig. 2 Purification of recombinant mouse TFF2 secreted by CHO-K1 cells.** Culture medium of recombinant CHO-K1(pMIG/mTFF2) cells was collected, TFF2 was concentrated by precipitation with ammonium sulfate, redissolved and sequentially purified by gel-filtration on Sephadex G-50 column (A,B) and ion-exchange chromatography on DEAE-sepharose column (C,D). In (A, B): Eluted fractions were analyzed by gel-electrophoresis (18% PAAG) under reducing (A) and nonreducing (B) conditions. Fractions #31-39 (2ml/tube) were combined and applied on DEAE-sepharose. In (C): TFF2 was eluted with linear salt gradient and detected in electrophoresis as a single band (lanes/fractions #1-5). Molecular weight markers are shown in lane #6. In (D): Fractions 1 and 2 (from C) with pure peptide were combined and analyzed by electrophoresis in reducing (lane #2) and nonreducing (lane #1) conditions. Molecular weight markers are shown in lane #3. Gels were stained with Coomassie Blue R-250.
